# Supplementary material for: Identification of delayed diagnosis of paediatric appendicitis in administrative data: a multicentre retrospective validation study
Source: HighWire-hosted journal article supplement (doi:10.1136/bmjopen-2022-064852), 2023-02-01
Supplement: bmjopen-2022-064852supp001_data_supplement.pdf [file bmjopen-2022-064852supp001_data_supplement.pdf]

**Supplemental material**

**Supplemental Table 1:** Definitions of delayed diagnosis.

**Supplemental Table 2:** Diagnosis codes used to identify specific conditions presents at the initial encounter.

**Supplemental Table 3:** Permissive model predicting delayed diagnosis

**Supplemental Table 4:** Strict model predicting delayed diagnosis

**Supplemental Table 1:** Definitions of delayed diagnosis.

| <b>Likelihood of delay</b> | <b>Definition</b>                                                                                                                                                                                                                                                                                             |
|----------------------------|---------------------------------------------------------------------------------------------------------------------------------------------------------------------------------------------------------------------------------------------------------------------------------------------------------------|
| Near-definitely not        | (1) there were no signs of the condition on the prior encounter; (2) an alternative explanation for the prior encounter symptoms is definite or almost definite; or (3) the time course makes the condition virtually certain not to have been present.                                                       |
| Probably not               | It is very unlikely that the condition was present on the prior encounter, and symptoms, signs, and other data at that time mostly pointed away from the condition.                                                                                                                                           |
| Possibly                   | (1) it is possible the condition was present, but there are factors for and against that theory; (2) determination is confusing; (3) there is limited detail from which to decide; or (4) there are some alternative explanations for the case's features, but they have similar likelihood to the condition. |
| Probably                   | More likely than not, the patient had the condition on the prior encounter. Evidence pointed toward the condition, or few alternative explanations existed.                                                                                                                                                   |
| Near-definitely            | The patient almost definitely or definitely had the condition on the prior encounter. Generally, these cases have clear evidence that the condition was present on the prior encounter. Alternatively, there is no other plausible explanation for the symptoms/signs on the prior encounter.                 |

**Supplemental Table 2:** Diagnosis codes used to identify specific conditions presents at the initial encounter.

| Diagnosis                                   | Code System | Diagnosis Codes                                                                                            |
|---------------------------------------------|-------------|------------------------------------------------------------------------------------------------------------|
| Abdominal pain                              | ICD-9       | 289.2, 787.3, 789.00, 789.01, 789.02, 789.03, 789.04, 789.05, 789.06, 789.07, 789.09                       |
| Abdominal pain                              | ICD-10      | I88.0, I88.9, N83.202, R10.0, R10.11, R10.12, R10.13, R10.2, R10.30, R10.31, R10.32, R10.33, R10.84, R10.9 |
| Constipation                                | ICD-9       | 564.00, 564.09                                                                                             |
| Constipation                                | ICD-10      | K59.00, K59.09                                                                                             |
| Dehydration                                 | ICD-9       | 276.51                                                                                                     |
| Dehydration                                 | ICD-10      | E86.0                                                                                                      |
| Fever                                       | ICD-9       | 780.6                                                                                                      |
| Fever                                       | ICD-10      | R50.9                                                                                                      |
| Gastroenteritis                             | ICD-9       | 008.8, 009.0, 535.00, 535.50, 558.9, 787.01, 787.02, 787.03, 787.91                                        |
| Gastroenteritis                             | ICD-10      | A08.4, A09, K29.00, K29.70, K52.9, R11.0, R11.10, R11.2, R19.7                                             |
| Genitourinary condition                     | ICD-9       | 603.9, 604.90, 620.8                                                                                       |
| Genitourinary condition                     | ICD-10      | N44.03, N45.1, N47.6, N50.819, N70.91, N76.0, N83.20, N83.9, N89.8, N93.8, N93.9, N94.6                    |
| Head, ears, eyes, nose, or throat condition | ICD-9       | 034.0, 381.01, 382.00, 382.9, 388.70, 462, 463, 464.4, 465.9                                               |
| Head, ears, eyes, nose, or throat condition | ICD-10      | H66.43, H66.91, J02.0, J02.8, J02.9, J05.0, J06.9, J11.1, J34.89                                           |
| Urinary tract infection                     | ICD-9       | 590.80, 595.0, 595.9, 599.0, 788.1, 791.9                                                                  |
| Urinary tract infection                     | ICD-10      | N30.00, N39.0, R30.0                                                                                       |
| Viral syndrome                              | ICD-9       | 057.9, 079.99                                                                                              |
| Viral syndrome                              | ICD-10      | B34.9, B97.89                                                                                              |

**Supplemental Table 3.** Permissive model predicting delayed diagnosis, derived from the derivation cohort only. The permissive model predicted delay with a definition of delay that included “possible,” “probable”, and “near-definite” delayed diagnosis cases.

| Variable                                                              | Adjusted odds ratio (95% confidence interval) | p      |
|-----------------------------------------------------------------------|-----------------------------------------------|--------|
| Complex chronic condition                                             | 1.30 (0.52, 3.27)                             | 0.58   |
| Revisit interval, days (compared with 0)                              |                                               |        |
| 1                                                                     | 0.91 (0.31, 2.70)                             | 0.86   |
| 2                                                                     | 0.33 (0.11, 0.99)                             | 0.05   |
| 3                                                                     | 0.26 (0.06, 1.18)                             | 0.08   |
| 4                                                                     | 0.08 (0.02, 0.34)                             | <0.001 |
| 5                                                                     | 0.04 (0.01, 0.18)                             | <0.001 |
| 6                                                                     | 0.05 (0.01, 0.26)                             | <0.001 |
| 7                                                                     | 0.04 (0.01, 0.24)                             | <0.001 |
| Initial encounter diagnosis                                           |                                               |        |
| Abdominal pain                                                        | 0.64 (0.27, 1.50)                             | 0.30   |
| Constipation                                                          | 2.85 (0.86, 9.46)                             | 0.09   |
| Dehydration                                                           | NA                                            | 0.98   |
| Fever                                                                 | 0.75 (0.24, 2.31)                             | 0.61   |
| Gastroenteritis or vomiting                                           | 3.90 (1.63, 9.30)                             | <0.001 |
| Genitourinary problem                                                 | 1.04 (0.19, 5.69)                             | 0.96   |
| Head, ear, eyes, nose or throat problem                               | 0.33 (0.10, 1.08)                             | 0.07   |
| UTI or dysuria                                                        | 2.35 (0.56, 9.83)                             | 0.24   |
| Viral syndrome                                                        | 0.95 (0.26, 3.47)                             | 0.94   |
| None of the above                                                     | 0.07 (0.02, 0.34)                             | <0.001 |
| Final diagnosis of perforated appendicitis during diagnosis encounter | 8.29 (3.20, 21.52)                            | <0.001 |
| Diagnosis encounter LOS, days (compared with 0-1)                     |                                               |        |
| 2-3                                                                   | 0.93 (0.40, 2.17)                             | 0.86   |
| 4-7                                                                   | 3.98 (1.31, 12.07)                            | 0.01   |
| >7                                                                    | 0.61 (0.20, 1.87)                             | 0.39   |

LOS; length of stay; NA: could not be estimated; UTI: urinary tract infection

**Supplemental Table 4.** Strict model predicting delayed diagnosis, derived from the derivation cohort only. The strict model predicted delay with a definition of delay that included “near-definite” delayed diagnosis cases.

| Variable                                                              | Adjusted odds ratio (95% confidence interval) | p      |
|-----------------------------------------------------------------------|-----------------------------------------------|--------|
| Complex chronic condition                                             | 0.79 (0.37, 1.69)                             | 0.54   |
| Revisit interval, days (compared with 0)                              |                                               |        |
| 1                                                                     | 0.76 (0.39, 1.49)                             | 0.43   |
| 2                                                                     | 0.16 (0.08, 0.35)                             | <0.001 |
| 3                                                                     | 0.10 (0.04, 0.27)                             | <0.001 |
| 4                                                                     | 0.07 (0.03, 0.21)                             | <0.001 |
| 5                                                                     | 0.03 (0.01, 0.15)                             | <0.001 |
| 6                                                                     | 0.01 (0.00, 0.11)                             | <0.001 |
| 7                                                                     | 0.03 (0.00, 0.25)                             | <0.001 |
| Initial encounter diagnosis                                           |                                               |        |
| Abdominal pain                                                        | 0.95 (0.56, 1.61)                             | 0.85   |
| Constipation                                                          | 0.90 (0.44, 1.83)                             | 0.76   |
| Dehydration                                                           | 1.57 (0.55, 4.49)                             | 0.40   |
| Fever                                                                 | 0.64 (0.30, 1.37)                             | 0.25   |
| Gastroenteritis or vomiting                                           | 1.01 (0.59, 1.74)                             | 0.96   |
| Genitourinary problem                                                 | 0.87 (0.16, 4.59)                             | 0.87   |
| Head, ear, eyes, nose or throat problem                               | 0.84 (0.31, 2.23)                             | 0.72   |
| UTI or dysuria                                                        | 0.12 (0.02, 0.66)                             | 0.01   |
| Viral syndrome                                                        | 3.47 (1.38, 8.72)                             | 0.01   |
| None of the above                                                     | 0.38 (0.15, 0.95)                             | 0.04   |
| Final diagnosis of perforated appendicitis during diagnosis encounter | 2.90 (1.58, 5.30)                             | <0.001 |
| Diagnosis encounter LOS, days (compared with 0-1)                     |                                               |        |
| 2-3                                                                   | 1.11 (0.56, 2.22)                             | 0.76   |
| 4-7                                                                   | 1.29 (0.62, 2.69)                             | 0.49   |
| >7                                                                    | 1.34 (0.59, 3.07)                             | 0.49   |

LOS; length of stay; UTI: urinary tract infection
