# Supplementary material for: Identification of delayed diagnosis of paediatric appendicitis in administrative data: a multicentre retrospective validation study
Source: HighWire-hosted journal article supplement (doi:10.1136/bmjopen-2022-064852), 2023-02-01
Supplement: bmjopen-2022-064852supp002_data_supplement.pdf [file bmjopen-2022-064852supp002_data_supplement.pdf]

**Instructions:**

**Apply this calculator only to appendicitis patients with two ED encounters within 7 days, with the second resulting in an appendicitis diagnosis**

Note: This calculator should only be applied retrospectively to children who have already had two encounters and cannot be used to predict the likelihood of appendicitis during or after a single encounter.

**Information from the first encounter**

|                                   |    |
|-----------------------------------|----|
| Complex chronic condition         | No |
| Abdominal pain diagnosis          | No |
| Constipation diagnosis            | No |
| Dehydration diagnosis             | No |
| Fever diagnosis                   | No |
| Gastroenteritis diagnosis         | No |
| Genitourinary problem diagnosis   | No |
| HEENT problem diagnosis           | No |
| Urinary tract infection diagnosis | No |
| Viral syndrome diagnosis          | No |

**Information from the second encounter**

|                                      |    |
|--------------------------------------|----|
| Days between encounters              | 3  |
| Hospital days                        | 0  |
| Perforated appendicitis at diagnosis | No |

**Predicted probability of delayed diagnosis****1.7%**

| Predictor                         | Beta coefficient |
|-----------------------------------|------------------|
| Intercept                         | 1.183116261      |
| Perforated appy                   | 1.73496391       |
| CCC                               | -0.337679678     |
| LOS 2-3                           | 0.274417066      |
| LOS 4-7                           | 0.894800027      |
| LOS > 7                           | 0.402697272      |
| Revisit 1d                        | 0.051710402      |
| Revisit 2d                        | -1.572028563     |
| Revisit 3d                        | -1.992213603     |
| Revisit 4d                        | -3.530247947     |
| Revisit 5d                        | -4.380602173     |
| Revisit 6d                        | -4.890563329     |
| Revisit 7d                        | -3.406296157     |
| Abdominal pain diagnosis          | -0.015330246     |
| Constipation diagnosis            | 0.150484262      |
| Dehydration diagnosis             | 0.210586845      |
| Fever diagnosis                   | -0.508220633     |
| Gastroenteritis diagnosis         | 0.708369608      |
| Genitourinary problem diagnosis   | -1.173802692     |
| HEENT problem diagnosis           | -0.744005787     |
| Urinary tract infection diagnosis | 2.081011214      |
| Viral syndrome diagnosis          | -0.497649125     |
| None of the above diagnoses       | -3.246578991     |
| <b>Patient's total be</b>         |                  |
| <b>Beta to pred prol</b>          |                  |

**Patient's betas**

1.183116261

0

0

0

0

0

0

0

-1.992213603

0

0

0

0

0

0

0

0

0

0

0

0

0

-3.246578991

**-4.055676333****0.017028757**
